# Supplementary material for: Efficiently reducing the plant growth inhibition of CuO NPs using rice husk-derived biochar: experimental demonstration and mechanism investigation
Source: Royal Society of Chemistry journal article supplement (doi:10.1039/c7en00211d), 2017-01-01
Supplement: c7en00211d1.pdf [file c7en00211d1.pdf]

**Electronic Supporting Information**

**For**

**Efficiently Reducing the Plant Growth Inhibition of CuO NPs by Rice Husk  
Derived Biochar: Experimental Demonstration and Mechanism Investigation**

Xiao-Feng Sima,<sup>a</sup> Xian-Cheng Shen,<sup>a</sup> Tao Fang,<sup>b</sup> Han-Qing Yu<sup>a</sup> and Hong Jiang<sup>a\*</sup>

<sup>a</sup> CAS Key Laboratory of Urban Pollutant Conversion, Department of Chemistry,  
University of Science & Technology of China, Hefei, 230026, P.R. China

<sup>b</sup> Institute of Hydrobiology, Chinese Academy of Sciences, Wuhan, 430072, P.R.  
China

**\* Corresponding author:**

Dr. Hong Jiang

Fax: 86-551-63607482; E-mail: [jhong@ustc.edu.cn](mailto:jhong@ustc.edu.cn)

## **Content**

### **Text S1**

**Seed Germination.** Wheat seeds were surface sterilized with 10% H<sub>2</sub>O<sub>2</sub> solution for 10 min and then rinsed three times with deionized water. The seeds were then immersed in deionized water or NPs suspension (10, 50, 100, 500 mg L<sup>-1</sup>) for 2h. 5 mL CuO NPs suspensions with each concentration and 3% biochar (w/v) were added into 90 mm diameter × 15 mm depth Petri dishes lined with a filter paper. The seeds were subsequently placed in each dish (20 seeds each). The germination experiments were performed in five replicates, and control experiment was also conducted in the same suspension without biochar. The seeds were germinated in the dark by wrapping the Petri dishes with aluminum foil, and placed in a growth chamber with 14-h photoperiod, day/night temperature of 25/20 °C, and 65% relative humidity. Germination was quantified when the bud length surpassed half of the seed length. In addition, the length of roots and shoots were measured over the course of 4 d.

**Table S1.** Characteristics of CuO nanoparticles used in this study.

**Table S2.** Physicochemical characteristics of biochar used in this study.

**Table S3.** The functional group of pristine biochar and biochar with Cu<sup>2+</sup> adsorption determined by FTIR.

**Figure S1.** Transmission electron micrograph of CuO nanoparticle suspensions.

**Figure S2.** Frequency of size distribution of CuO NPs in nutrient solution determined by DLS.

**Figure S3.** SEM micrographs of the surface of the bio-chars.

**Figure S4.** The germination rate after 4 d germination in various concentrations CuO NPs suspension with and without biochar. Treatments resulting in significant difference are indicated by different letters ( $p < 0.05$ ).

**Figure S5.** Ratio of root and shoot elongation with biochar to those without biochar after 4 d germination.

**Figure S6.** The ratio of the roots and shoots growth length with biochar to those without biochar after 9d in hydroponic culture experiment.

**Figure S7.** The ratio of weight of tissue with biochar to those without biochar in hydroponic culture experiment.

**Figure S8.** The length growth of roots (A) and shoots (B) in continuous hydroponic culture experiment of various concentrations CuO NPs suspension with and without biochar. Treatments resulting in significant difference are indicated by different letters ( $p < 0.05$ ).

**Figure S9.** The length growth of roots (A) and shoots (B) in hydroponic culture experiment of various concentrations  $\text{Cu}^{2+}$  solution. Treatments resulting in significant difference are indicated by different letters ( $p < 0.05$ ).

**Figure S10.** (A) The concentration of  $\text{Cu}^{2+}$  released from different suspensions ( $100 \text{ mg L}^{-1}$  CuO NPs,  $100 \text{ mg L}^{-1}$  CuO NPs + plant,  $100 \text{ mg L}^{-1}$  CuO NPs + biochar,  $100 \text{ mg L}^{-1}$  CuO NPs + plant + biochar). (B) Adsorption kinetics of  $\text{Cu}^{2+}$  on biochar.

**Figure S11.** The time dependent adsorption of  $\text{Cu}^{2+}$  by biochar (initial  $\text{Cu}^{2+}$  concentration:  $200 \text{ mg L}^{-1}$ ; adsorption dosage:  $30 \text{ g L}^{-1}$ ).

**Figure S12.** FTIR spectra of pristine biochar and biochar with  $\text{Cu}^{2+}$  adsorption.

**Figure S13.** XRD patterns of biochar with  $\text{Cu}^{2+}$  adsorption.

**Figure S14.** SEM images of wheat root surface in hydroponic culture experiment under treatment of (a)  $100 \text{ mg L}^{-1}$  CuO NPs, and (b)  $100 \text{ mg L}^{-1}$  CuO NPs + biochar. Representative EDS analysis of the selected area in SEM pictures (c) and (d).

**Table S1.** Characteristics of CuO nanoparticles used in this study.

| Particle                                       | CuO NPs                             |             |
|------------------------------------------------|-------------------------------------|-------------|
| Particle size by TEM (nm)                      | 15.7 ± 5.8                          |             |
| Purity (%)                                     | > 99.9%                             |             |
| Surface area (m <sup>2</sup> g <sup>-1</sup> ) | 13.1                                |             |
|                                                | pH                                  | 6.49        |
| In 25% strength                                | Conductivity (μs cm <sup>-1</sup> ) | 901 ± 12    |
| Hoagland solution                              | Zeta potential (mV)                 | -12.6 ± 1.2 |
|                                                | Hydrodynamic size by DLS (nm)       | 350 ± 28    |

**Table S2.** Physicochemical characteristics of biochar used in this study.

| Surface area<br>(m <sup>2</sup> /g) | Pore volume<br>(cm <sup>3</sup> /g) | Pore size<br>(nm) | Elemental compositions (wt. %) |     |      |      | Ash<br>(wt. %) |
|-------------------------------------|-------------------------------------|-------------------|--------------------------------|-----|------|------|----------------|
|                                     |                                     |                   | C                              | H   | O    | N    |                |
| 78.6                                | 0.051                               | 2.6               | 32.8                           | 2.2 | 13.7 | 0.35 | 51.5           |

**Table S3.** The functional group of pristine biochar and biochar with Cu<sup>2+</sup> adsorption determined by FTIR.

| Functional group             | Band positions (cm <sup>-1</sup> ) |              |
|------------------------------|------------------------------------|--------------|
|                              | Pristine biochar                   | Biochar with |
| O-H stretch                  | 3435                               | 3440         |
| Aliphatic C-H stretch        | 2923                               | 2923         |
|                              | 2854                               | 2854         |
| Aromatic C-C stretch         | 1618                               | 1619         |
| C-O stretch                  | 1384                               | 1384         |
| Si-O-Si asymmetric vibration | 1101                               | 1102         |

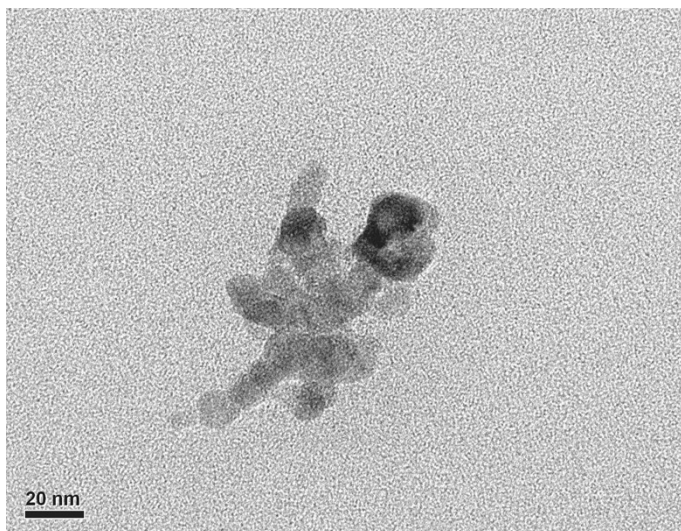

**Figure S1.** Transmission electron micrograph of CuO nanoparticle suspensions.



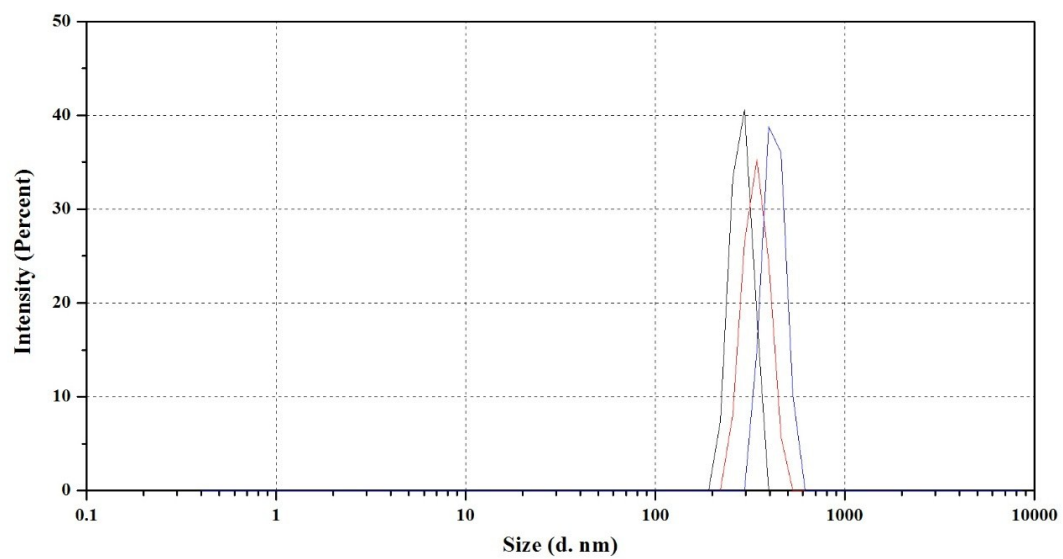

**Figure S2.** Frequency of size distribution of CuO NPs in nutrient solution determined by DLS.

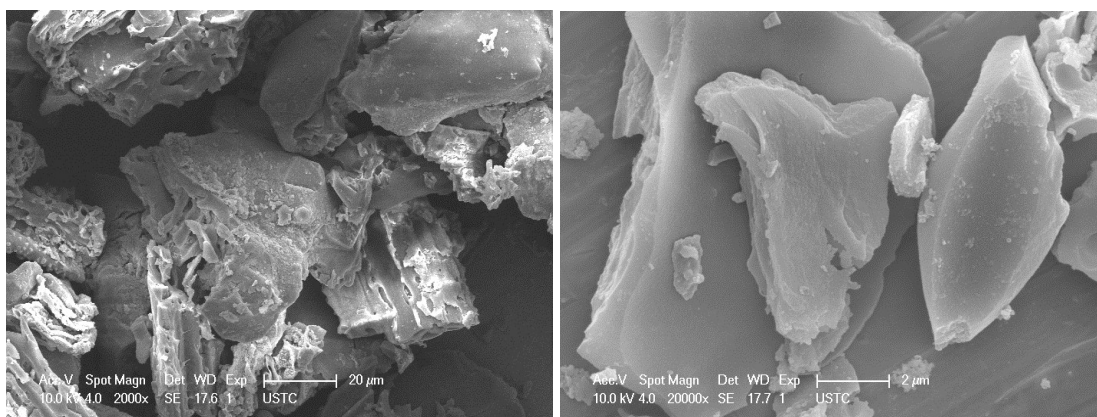

**Figure S3.** SEM micrographs of the surface of the bio-chars.

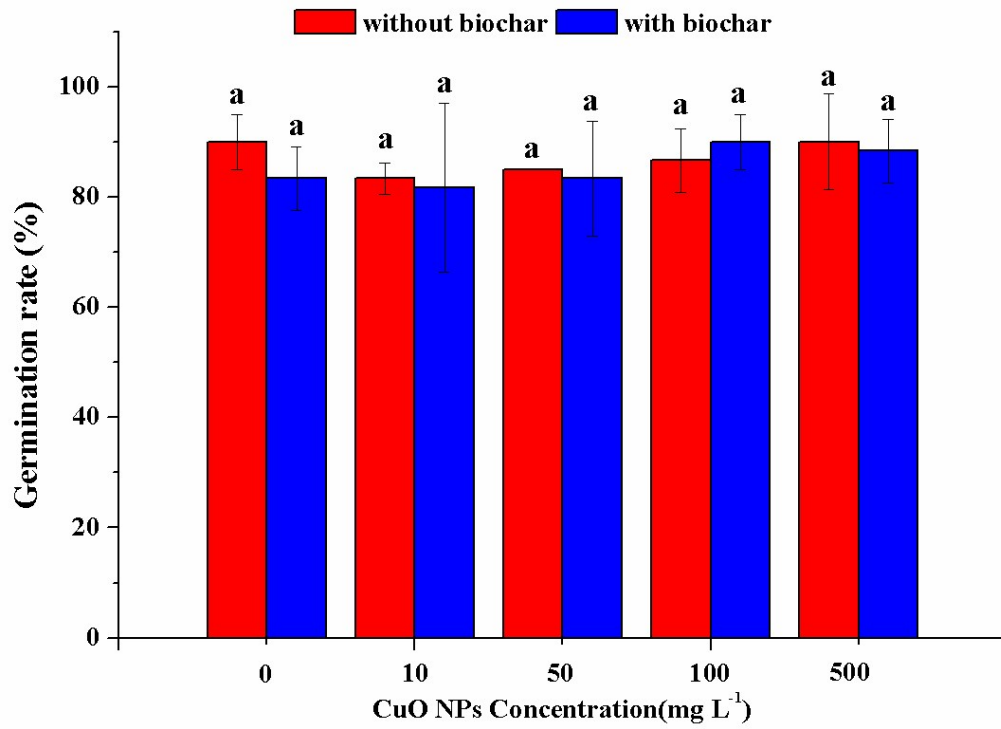

**Figure S4.** The germination rate after 4 d germination in various concentrations CuO NPs suspension with and without biochar. Treatments resulting in significant difference are indicated by different letters ( $p < 0.05$ ).

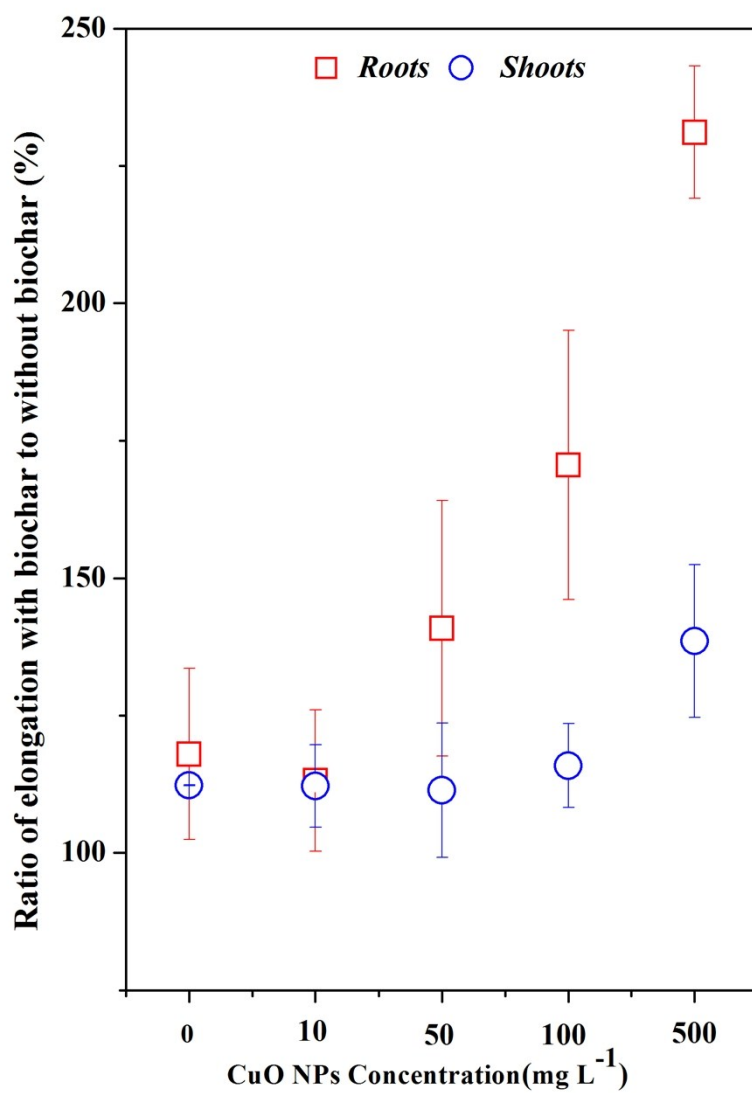

**Figure S5.** Ratio of root and shoot elongation with biochar to those without biochar after 4 d germination.

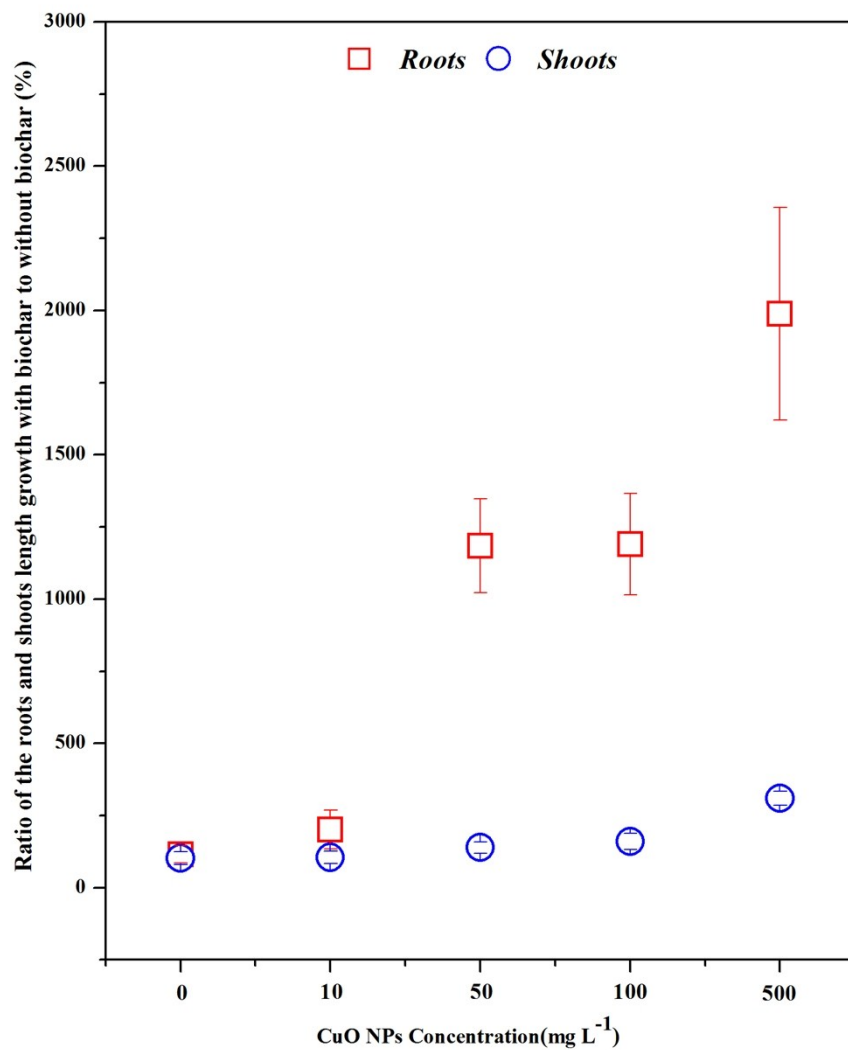

**Figure S6.** The ratio of the roots and shoots growth length with biochar to those without biochar after 9d in hydroponic culture experiment.

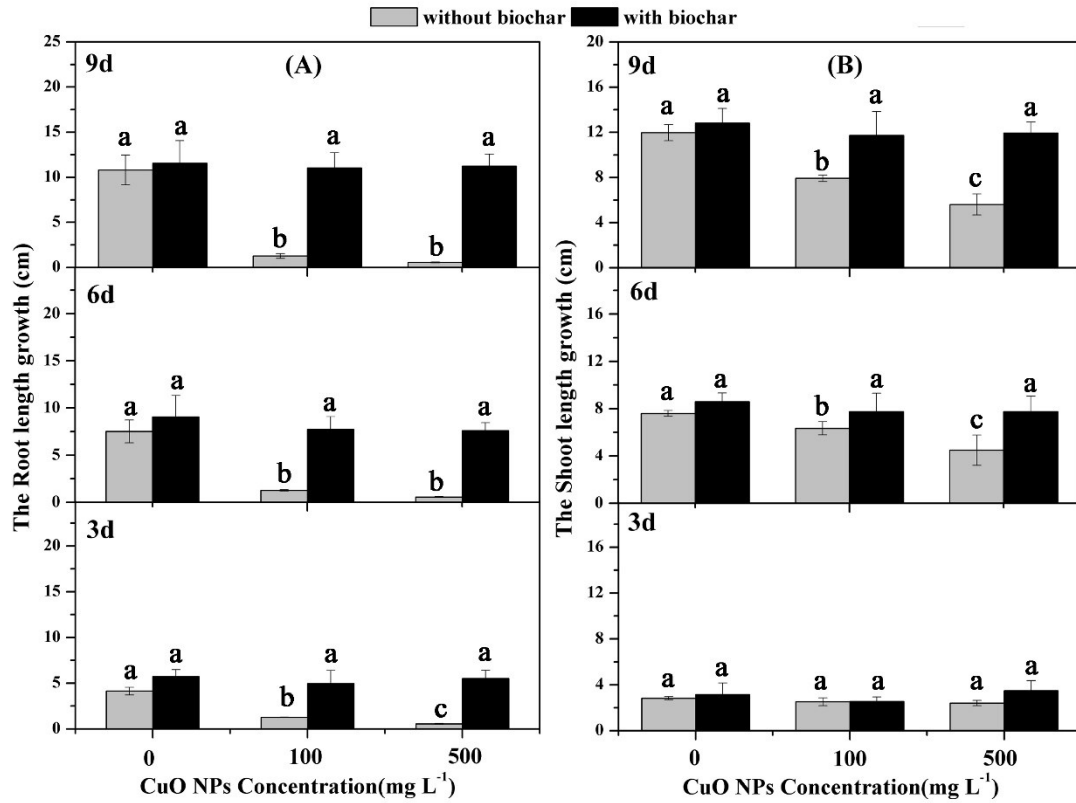

**Figure S7.** The length growth of roots (A) and shoots (B) in continuous hydroponic culture experiment of various concentrations CuO NPs suspension with and without biochar. Treatments resulting in significant difference are indicated by different letters ( $p < 0.05$ ).

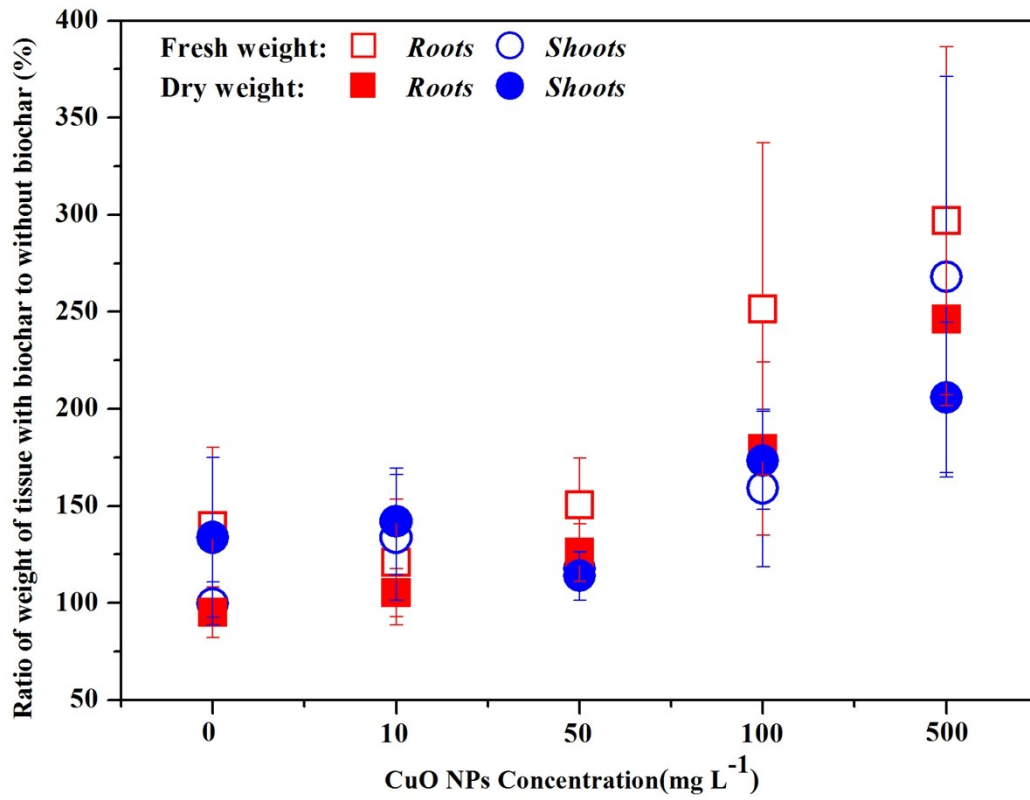

**Figure S8.** The ratio of weight of tissue with biochar to those without biochar in hydroponic culture experiment.

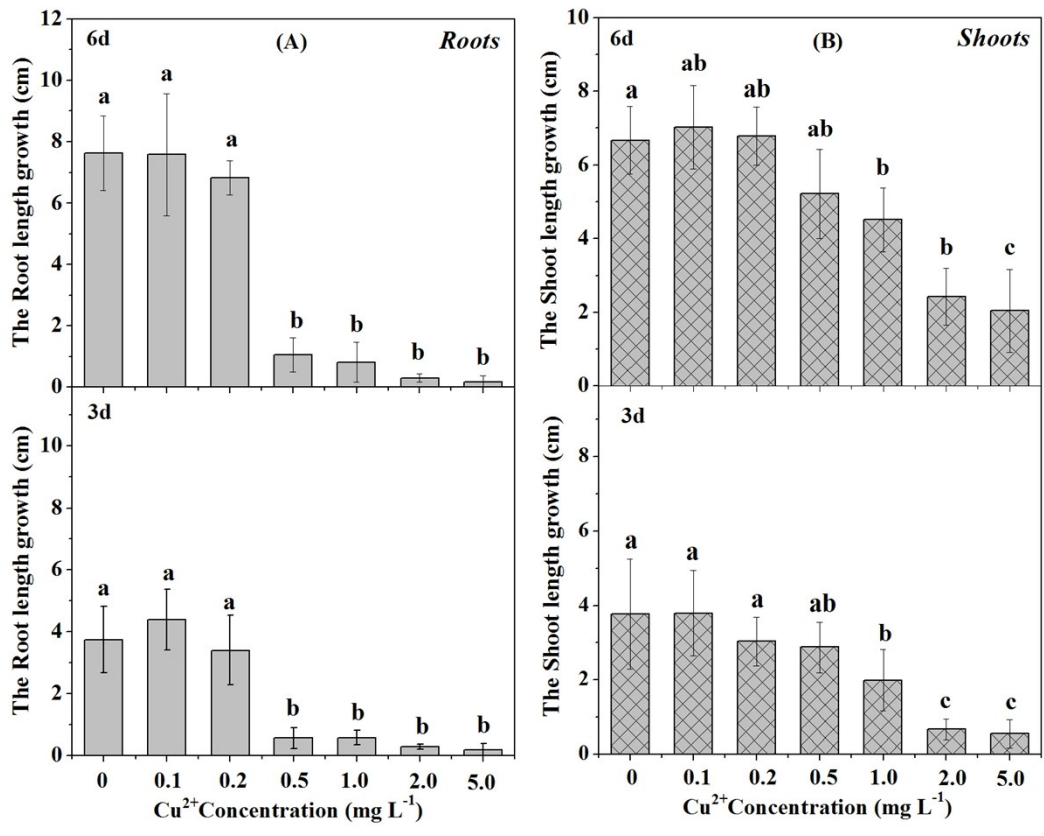

**Figure S9.** The length growth of roots (A) and shoots (B) in hydroponic culture experiment of various concentrations  $\text{Cu}^{2+}$  solution. Treatments resulting in significant difference are indicated by different letters ( $p < 0.05$ ).



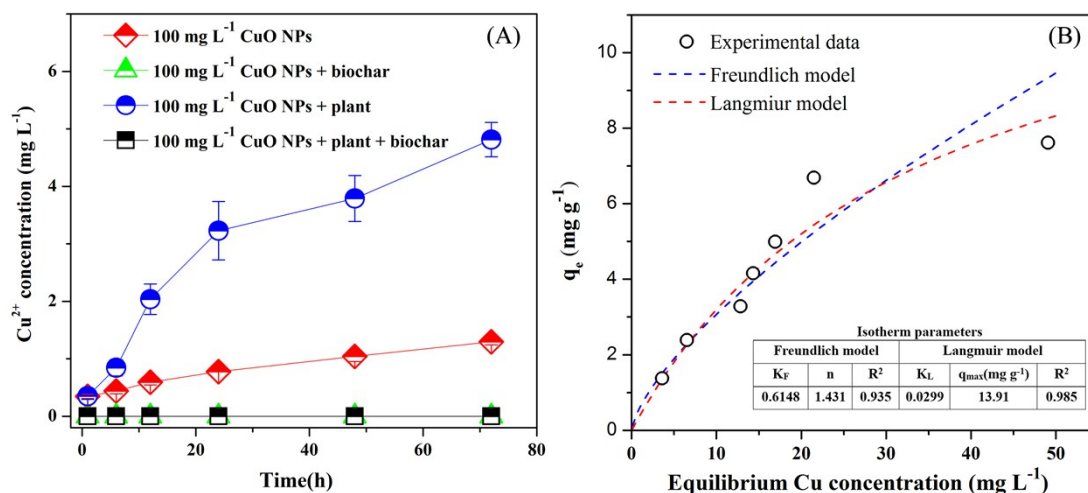

**Figure S10.** (A) The concentration of  $\text{Cu}^{2+}$  released from different suspensions (100 mg  $\text{L}^{-1}$  CuO NPs, 100 mg  $\text{L}^{-1}$  CuO NPs + plant, 100 mg  $\text{L}^{-1}$  CuO NPs + biochar, 100 mg  $\text{L}^{-1}$  CuO NPs + plant + biochar). (B) The adsorption isotherms of  $\text{Cu}^{2+}$  adsorption by biochar (dosage: 30 g  $\text{L}^{-1}$ ; time: 3 d).

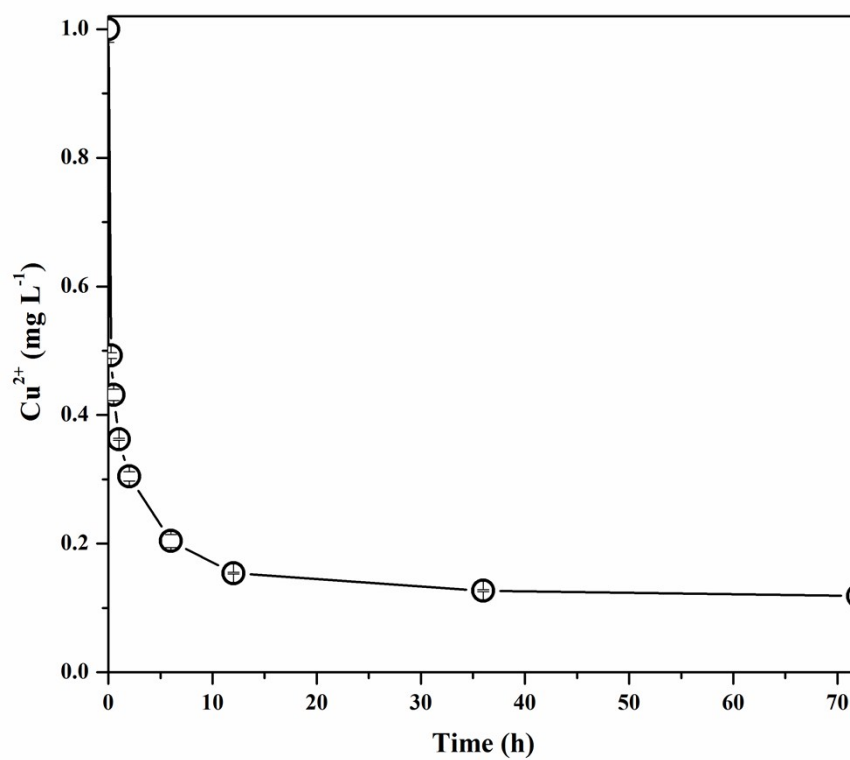

**Figure S11.** The time dependent adsorption of  $\text{Cu}^{2+}$  by biochar (initial  $\text{Cu}^{2+}$  concentration:  $200 \text{ mg L}^{-1}$ ; adsorption dosage:  $30 \text{ g L}^{-1}$ ).

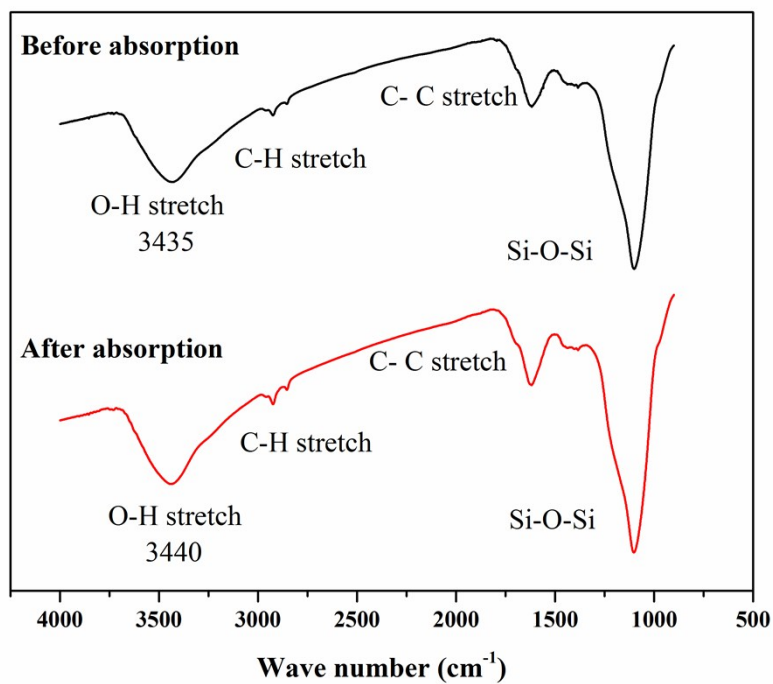

**Figure S12.** FTIR spectra of pristine biochar and biochar with Cu<sup>2+</sup> adsorption.

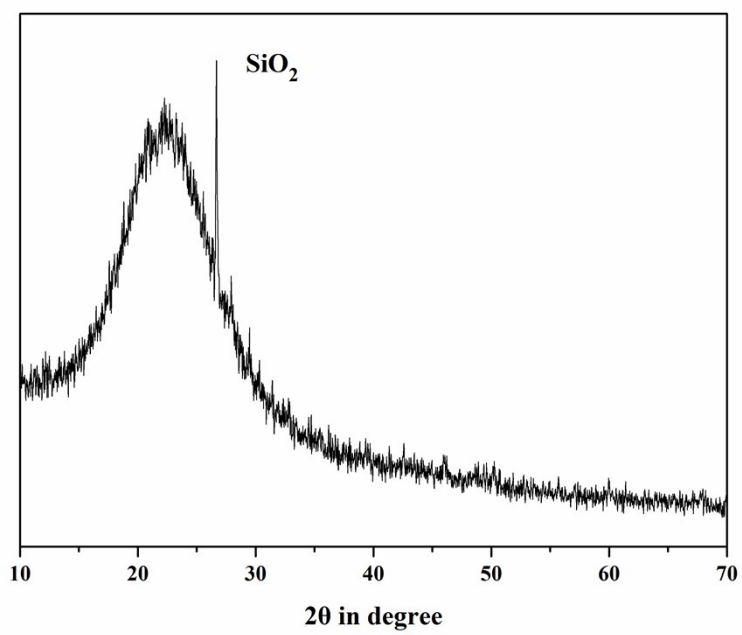

**Figure S13.** XRD patterns of biochar with Cu<sup>2+</sup> adsorption.

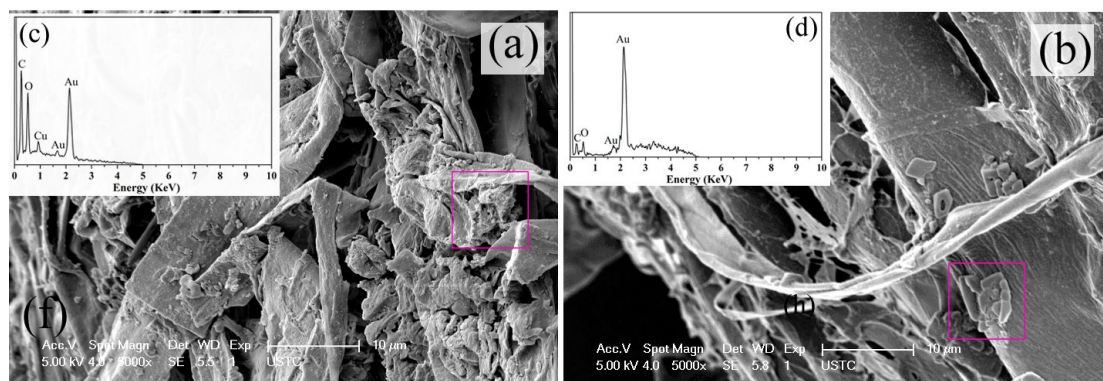

**Figure S14.** SEM images of wheat root surface in hydroponic culture experiment under treatment of (a) 100 mg L<sup>-1</sup> CuO NPs, and (b) 100 mg L<sup>-1</sup> CuO NPs + biochar. Representative EDS analysis of the selected area in SEM pictures (c) and (d).
